# Supplementary material
Source: MDPI journal article supplement (https://www.mdpi.com/2075-4442/11/1/19)
Supplement: s1 [file s1]

# Thermal Fatigue Resistance Studies of Multilayer CrN and AlTiN Coatings Deposited on Plasma Nitrided H-13 Hot Work Steel

Chetan Gurada <sup>1</sup>, Rajesh Mundotia <sup>2</sup>, Umesh Mhatre <sup>2</sup>, Ashwin Kale <sup>2</sup>, and Dushyant Kothari <sup>1,\*</sup>

<sup>1</sup> Department of Physics, University of Mumbai, Santacruz (E), Mumbai 400 098, Maharashtra, India

<sup>2</sup> Surface Modification Technologies Pvt. Ltd., Emerald Premises, Sativali Road, Vasai (East), Palghar 401 208, Maharashtra, India

\* Correspondence: kothari@physics.mu.ac.in

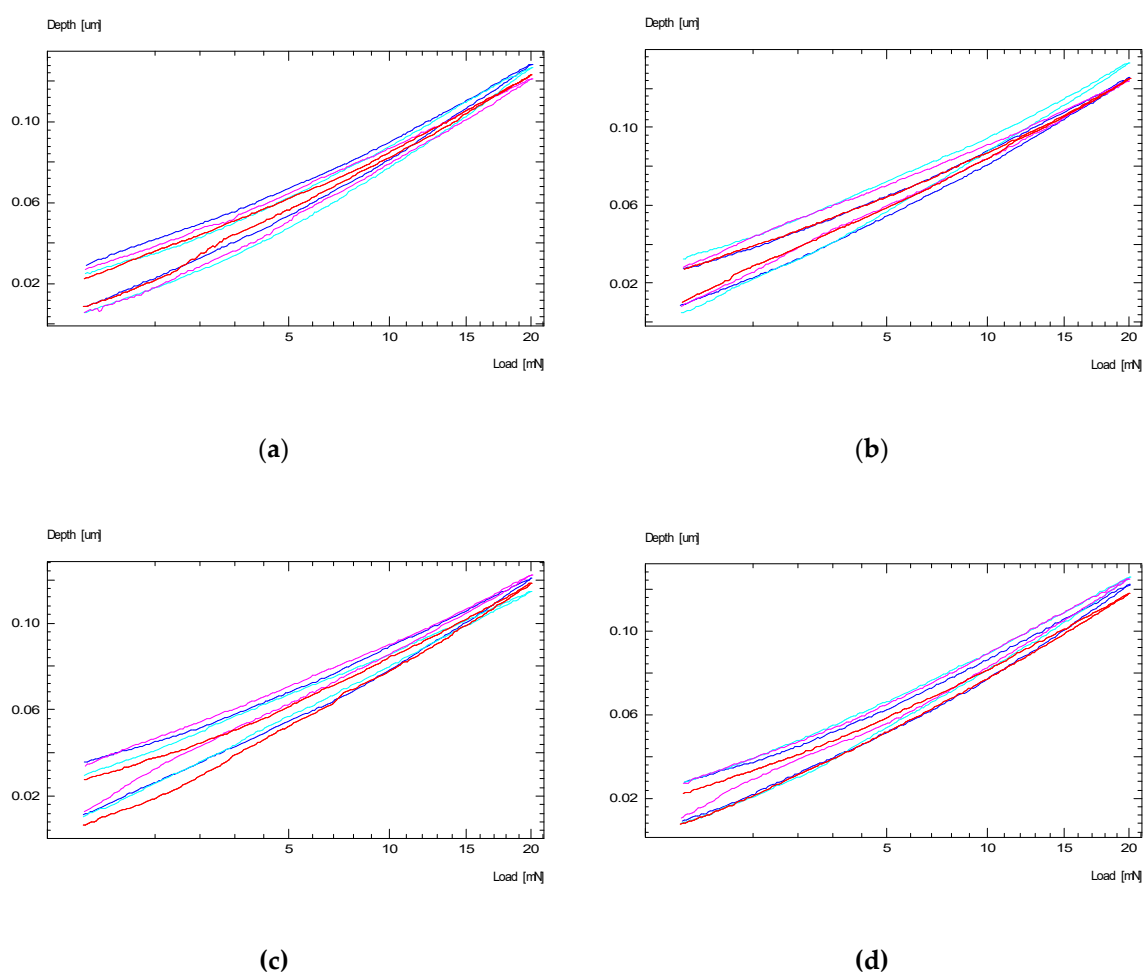

**Figure S1.** Loading-unloading curves of micro-hardness test carried out on: (a) m-CrN\_PN50; (b) m-CrN\_PN200; (c) m-AlTiN\_PN50; (d) m-AlTiN\_PN200.

|       | H-13_PN50                                                                                                                                      | m-CrN_PN50                                                                                                                                      | m-AlTiN_PN50                                                                                                                                     |
|-------|------------------------------------------------------------------------------------------------------------------------------------------------|-------------------------------------------------------------------------------------------------------------------------------------------------|--------------------------------------------------------------------------------------------------------------------------------------------------|
| TF100 | 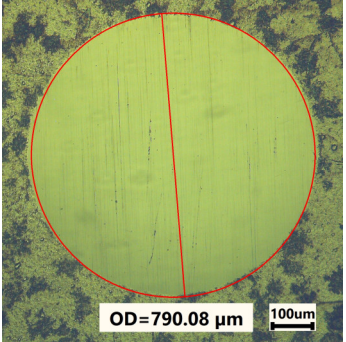<br>OD=790.08 $\mu\text{m}$ 100um                             | <br>OD=640.61 $\mu\text{m}$ ; ID=481.24 $\mu\text{m}$ 100um   | <br>OD=603.10 $\mu\text{m}$ ; ID=368.91 $\mu\text{m}$ 100um   |
| TF300 | <br>OD=801.92 $\mu\text{m}$ ; ID=787.24 $\mu\text{m}$ 100um  | <br>OD=643.12 $\mu\text{m}$ ; ID=482.80 $\mu\text{m}$ 100um  | <br>OD=605.01 $\mu\text{m}$ ; ID=364.76 $\mu\text{m}$ 100um  |
| TF500 | <br>OD=818.97 $\mu\text{m}$ ; ID=784.42 $\mu\text{m}$ 100um | <br>OD=656.66 $\mu\text{m}$ ; ID=480.94 $\mu\text{m}$ 100um | <br>OD=609.02 $\mu\text{m}$ ; ID=308.76 $\mu\text{m}$ 100um |

**Figure S2** Optical images (taken at 50x mag.) of wear craters (240 sec) for PN50 samples after thermal fatigue TF100, TF300 and TF500.

|       | H-13_PN200                                                                                                                                     | m-CrN_PN200                                                                                                                                     | m-ALTiN_PN200                                                                                                                                    |
|-------|------------------------------------------------------------------------------------------------------------------------------------------------|-------------------------------------------------------------------------------------------------------------------------------------------------|--------------------------------------------------------------------------------------------------------------------------------------------------|
| TF100 | 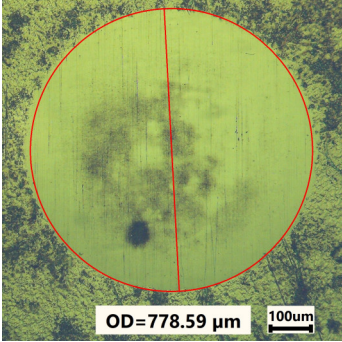<br>OD=778.59 $\mu\text{m}$ 100um                             | <br>OD=635.17 $\mu\text{m}$ ; ID=470.78 $\mu\text{m}$ 100um   | <br>OD=591.88 $\mu\text{m}$ ; ID=343.56 $\mu\text{m}$ 100um   |
| TF300 | <br>OD=785.37 $\mu\text{m}$ ; ID=771.27 $\mu\text{m}$ 100um  | <br>OD=638.65 $\mu\text{m}$ ; ID=467.65 $\mu\text{m}$ 100um  | <br>OD=596.42 $\mu\text{m}$ ; ID=340.85 $\mu\text{m}$ 100um  |
| TF500 | <br>OD=794.28 $\mu\text{m}$ ; ID=765.09 $\mu\text{m}$ 100um | <br>OD=658.03 $\mu\text{m}$ ; ID=472.48 $\mu\text{m}$ 100um | <br>OD=602.38 $\mu\text{m}$ ; ID=315.15 $\mu\text{m}$ 100um |

**Figure S3** Optical images (taken at 50x mag.) of wear craters (240 sec) for PN200 samples after thermal fatigue TF100, TF300 and TF500.
